# Supplementary material for: Mapping HIV-1 RNA Structure, Homodimers, Long-Range Interactions and persistent domains by HiCapR
Source: bioRxiv preprint, doi:10.1101/2024.09.03.610837, version 2 (2024-12-01)
Supplement: Supplementary Table3 [file 610837_file08.xlsx]

## Sheet: primers
primer	sequence(5'-3')
T7-RRE-F	GCGTAATACGACTCACTATAGGGCAGCAGGAAGCACTATGGGCGC
NL43-8177	TTTCTTGCTGGTTTTGCG
GX002-8160	CTGTCCTGCTGGTCCTG
T7-5UTR：	gggTAATACGACTCACTATAGGGTCTCTCTGGTTAGACCAG
NL43-1018:	GATCTAAGTTCTTCTGATCCTGTCTG
GX002-1036:	GATTTAACTTCTTCTGATCCTGCCTTG
